# Supplementary material
Source: PubMed Central journal article supplement (PMC3123050)
Supplement: supp_M111.222349_jbc.M111.222349-1.pdf [file supp_M111.222349_jbc.M111.222349-1.pdf]

# Han *et al*, Supplemental Figure s1

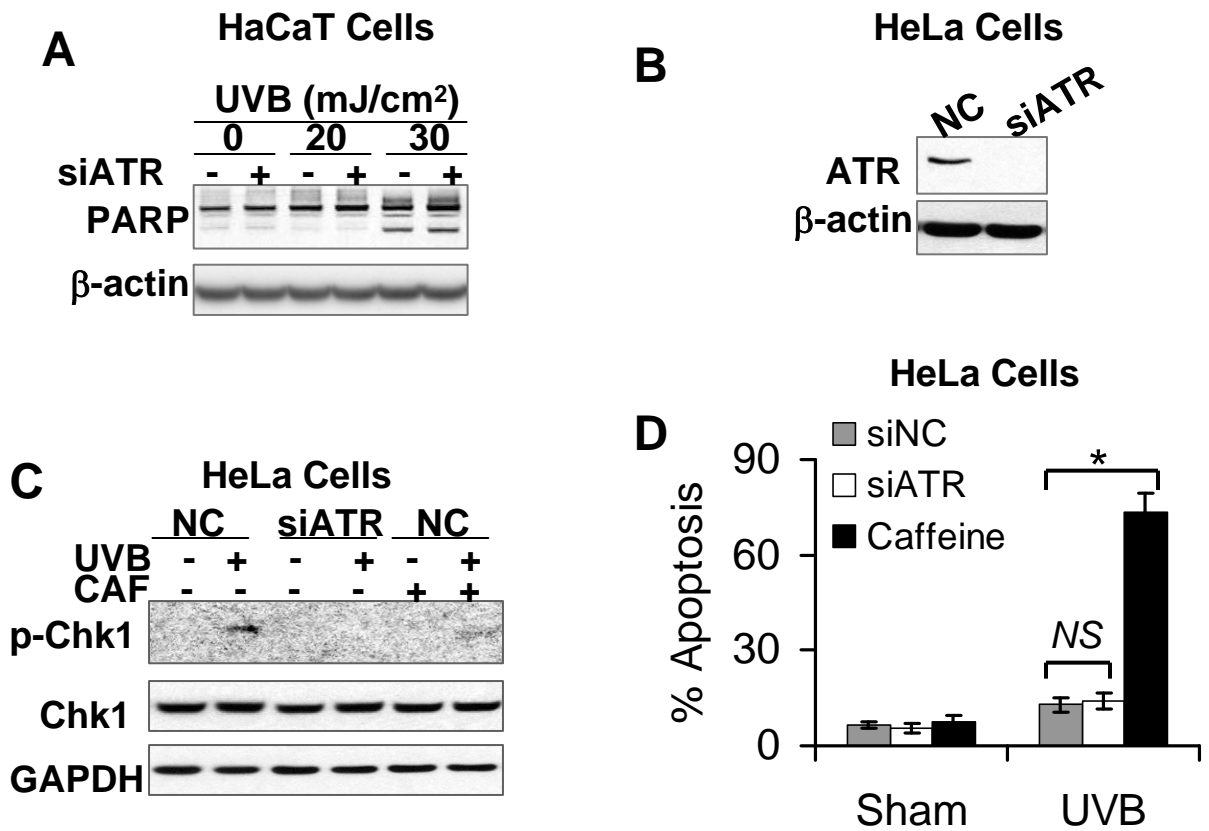

**Figure s1.** Related to Figure 2. A, Immunoblot analysis of PARP cleavage and  $\beta$ -actin in cells transfected with NC or siATR at 6 h post-UVB (20 or 30 mJ/cm<sup>2</sup>) or -sham. B, immunoblot analysis of ATR and  $\beta$ -actin in HeLa cells transfected with siRNA targeting ATR (siATR) or negative control (NC). C, immunoblot analysis of p-Chk1, Chk1 and GAPDH in HeLa cells transfected with siRNA targeting ATR (siATR) or negative control (NC) or treated with or without caffeine (1 mM), at 1.5 h post-UVB (30 mJ/cm<sup>2</sup>) or -sham. D, apoptosis analysis of HeLa cells as in C at 18 h post-UVB (30 mJ/cm<sup>2</sup>) or -sham.

## Han *et al*, Supplemental Figure s2

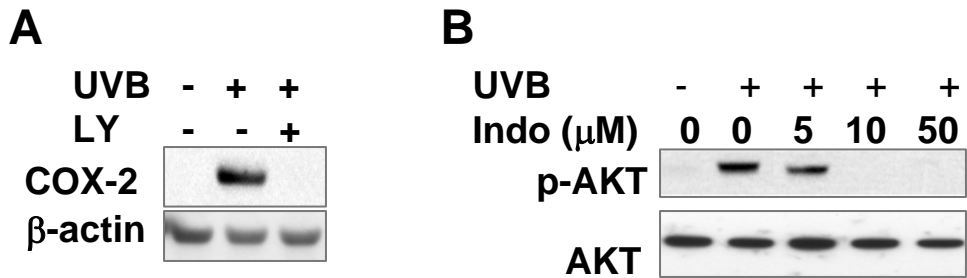

**Figure s2.** Related to Figure 4. H, immunoblot analysis of COX-2 and  $\beta$ -actin in cells treated with LY (10  $\mu$ M) at 1.5 h post-UVB (20 mJ/cm<sup>2</sup>) or -sham. I, immunoblot analysis of p-AKT and AKT in cells treated with indomethacin (Indo, 0, 5, 10 or 50  $\mu$ M) at 1.5 h post-UVB (20 mJ/cm<sup>2</sup>) or -sham.
